# Supplementary material
Source: MDPI journal article supplement (https://www.mdpi.com/1424-2818/15/4/484)
Supplement: s1 [file s1 › diversity-2279034-supplementary.pdf]

## Being safe, but not too safe: a nudibranch feeding on a bryozoan-associated hydrozoan

<sup>1</sup> Department of Earth and Environmental Sciences (DISAT), University of Milano-Bicocca, 20126 Milano, Italy; [davide.maggioni@unimib.it](mailto:davide.maggioni@unimib.it) (D.M.); [davide.seveso@unimib.it](mailto:davide.seveso@unimib.it) (D.S.); [paolo.galli@unimib.it](mailto:paolo.galli@unimib.it) (P.G.); [simone.montano@unimib.it](mailto:simone.montano@unimib.it) (S.M)

<sup>2</sup> Marine Research and High Education (MaRHE) Center, University of Milano-Bicocca, Faafu Magoodhoo Island 12030, Maldives

<sup>3</sup> Department of Biological and Environmental Sciences and Technologies (DiSTeBA), University of Salento, 73100 Lecce, Italy; [giulia.furfaro@unisalento.it](mailto:giulia.furfaro@unisalento.it)

<sup>4</sup> Museo di Biologia Marina ‘Pietro Parenzan’, 73010 Lecce, Italy; [michelesolca@gmail.com](mailto:michelesolca@gmail.com)

<sup>5</sup> Dubai Business School, University of Dubai, Dubai, UAE

\* Correspondence: [davide.maggioni@unimib.it](mailto:davide.maggioni@unimib.it); [giulia.furfaro@unisalento.it](mailto:giulia.furfaro@unisalento.it)

Phylogenetic tree showing relationships among various species, with bootstrap values indicated at the nodes. The tree is rooted at the bottom left with a scale bar of 0.01.

Species and Accession Numbers (from top to bottom):

- KM079341 *Cratena minor* ZSM-Mol-20110338
- KM079346 *Cratena minor* ZSM-Mol-20110345
- KM079345 *Cratena minor* MZSP-116702
- JQ996985 *Facelinidae* sp. 2 CASIZ-186008
- JQ996984 *Facelinidae* sp. 2 CASIZ-186258
- HM162591 *Sakuraeolis enosimensis* CASIZ-178876
- MT997032 *Sakuraeolis japonica* isolate-003
- KM079347 *Cratena peregrina* ZSM-Mol-20100125
- LS483293 *Cratena peregrina* RM-3-319
- JQ996965 *Caloria* sp. 4 CASIZ-186240
- JQ996966 *Caloria* sp. 4 CASIZ-186241
- MT997030 *Sakuraeolis arcana* ZMBN-117061
- OQ110615 *Sakuraeolis marhe*
- JX220446 *Favorinidae* sp. CASIZ-181297
- JX220447 *Favorinidae* sp. CASIZ-181293
- MK320905 *Myja karin* ZMMU-Op-610
- MK320906 *Myja karin* ZMMU-Op-611
- MK320909 *Myja cf. longicornis* ZMMU-Op-668
- MK320908 *Myja cf. longicornis* ZMMU-Op-667
- KY629605 *Duvaucelja odhneri* At12
